# Supplementary material for: MCM-41 and Na–magadiite silicates internal voids probed by pyrene fluorescence spectroscopy
Source: Royal Society of Chemistry journal article supplement (doi:10.1039/b903273h), 2009-01-01
Supplement: b903273h.pdf [file b903273h.pdf]

# MCM-41 and Na-Magadiite Silicates Internal Voids Probed by Pyrene Fluorescence Spectroscopy

Diniz Maciel Sena Jr.,<sup>\*a,b</sup> Heloise Oliveira Pastore<sup>a</sup> and Francisco Benedito Teixeira Pessine<sup>a</sup>

<sup>a</sup> Instituto de Química-DFQ, Universidade Estadual de Campinas, CP 6154 CEP 13084-971 Campinas, Brazil. Fax: +55 19 3521-3023; Tel: +55 19 3521-3077; E-mail: diniz@daad-alumni.de

<sup>b</sup> Current address: Departamento de Química Biológica, Universidade Regional do Cariri, Rua Coronel Antonio Luiz, 1161 CEP 63105-000 Crato, Brazil. Fax: +55 88 3102-1271; Tel: +55 88 3102-1212.

## Supplementary Information

Using data from alcohols dielectric constants,<sup>1</sup> and band intensity ratios ( $I_3/I_1$ ) from pyrene fluorescence spectra,<sup>2</sup> the graph in Fig. S1 was constructed to illustrate a linear relationship between environment polarity and  $I_3/I_1$  ratio. Linear regression equation was employed to determine apparent dielectric constant experienced by pyrene within the silicates.

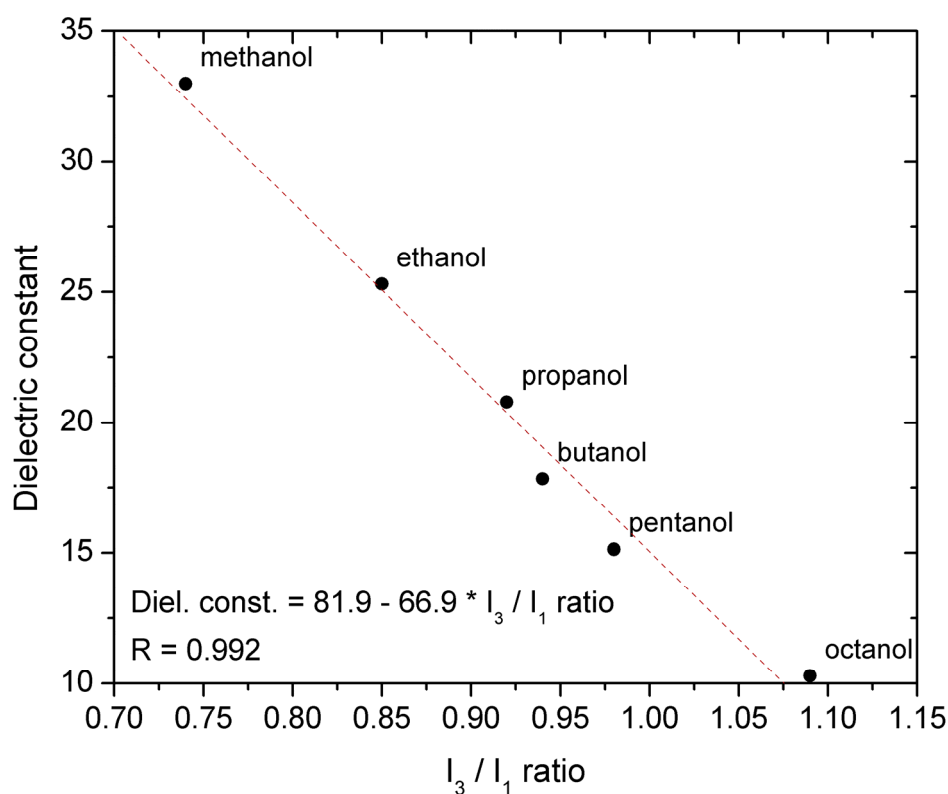

Fig. S1 – Linear fit of solvent dielectric constant vs. pyrene emission band intensity ratios  $I_3/I_1$

<sup>1</sup> D. R. Lide, *CRC Handbook of Chemistry and Physics*, CRC Press, 2006.

<sup>2</sup> D. C. Dong and M. A. Winnik, *Can. J. Chem.*, 1984, **62**, 2560-2565.
